# Supplementary material
Source: HighWire-hosted journal article supplement (https://bmjopen.bmj.com/content/12/7/e062893)

## Supplementary Figure 1: Participant and data selection.

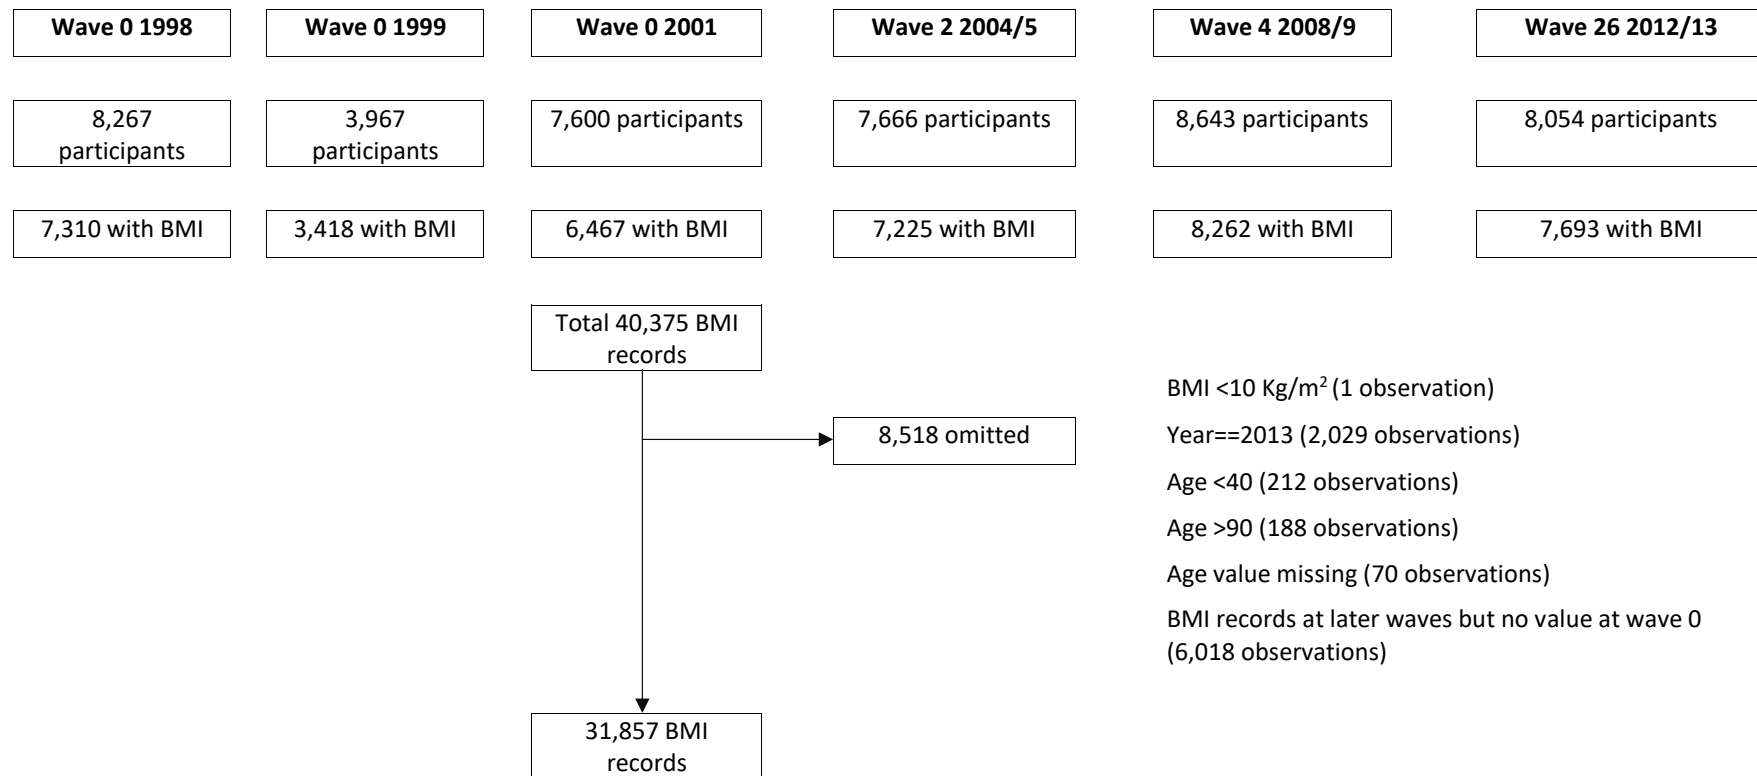

Supplement: inline-supplementary-material-1 [file inline-supplementary-material-1.pdf]
